# Supplementary material
Source: PubMed Central journal article supplement (PMC6782064)
Supplement: NIHMS404690-supplement-SI.pdf [file NIHMS404690-supplement-SI.pdf]

No Supporting Info for this article.
